# Supplementary material for: Ten-year analysis of microbiological profile and antibiotic sensitivity for bacterial keratitis in Korea
Source: PLoS One. 2019 Mar 1;14(3):e0213103. doi: 10.1371/journal.pone.0213103 (PMC6396910; doi:10.1371/journal.pone.0213103)
Supplement: S1 File — (XLSX) [file pone.0213103.s001.xlsx]

## Sheet: Sheet1
No.	subno	Classification (0: success, 1: fungus, 2: failure)	Age (onset of infection)	Laterality (R : 1, L : 2, B : 3)	Sex (M : 1, F : 2)	Date (infectiob diagnosed) (YYYYMMDD)	DM (O : 1, X : 2)	Immune deficiency status (Rheumatologic disease, Sjogren, RA, GVHD, Cancer, HIV, Cushing etc) (O : 1, X : 2)	Immune deficiency	Contact lens (O : 1, X : 2)	soft CL or RGP CL	Glaucoma medication (topical) (O : 1, X : 2)		Systemic immunosuppressant (O : 1, X : 2)	Topical steroids (O : 1, X : 2)	Trauma hx (O : 1, X : 2)	Ocular surgery (O : 1, X : 2)		Treatment (Medical : 0, Surgical : 1)	Surgery	eyeball saving (X : 1)	Visual acuity at infection onset	Visual acuity after resolution	Name of bacteria isolated	(Gram+ cocci : 1, Gram+ bacilli : 2, Gram- cocci : 3, Gram- bacilli : 4)	Amikacin	Amoxicillin /Clavulanic Acid	Ampicillin	Ampicillin/Sulbactam	Azithromycin	Aztreonam	Cefaclor	Cefazolin	Cefepime	Cefoperazone	Cefotaxime	Cefotetan	Ceftazidime	Ceftriaxone	Cefuroxime	Cephalothin	Chloramphenicol	Ciprofloxacin	Clindamycin	Colistin	Erythromycin	Gentamicin	Imipenem	Levofloxacin
1	1	0	58	2	1	20070120	2	2		2		1	Cosopt, Iopidine	2	1	2	1	PKP, PE & PCL	0			HM	HM	Serratia marcescens ss. Marcescens	4	S		R	R		S		R	S		S	S	S	S	R			S				S	S	S
2	1	0	38	2	1	20070409	2	2		2		2		2	2	2	2		0			(0.6)	(1.5)	Staphylococcus epidermidis	1		S	R					S	S		S				S	S	S	S	S		R	S	S
3	1	0	72	1	2	20070530	2	2		2		2		2	2	2	2		0			HM	0.02	Moraxella catarrhalis	3	S					S			S	S			S					S				S	S
4	1	0	3	2	1	20070710	2	2		2		2		2	2	2	2		0			nc	FC	Streptococcus pyogenes	1																	S		S		S
5	1	0	0.08	1	1	20070712	2	2		2		2		2	2	2	2		0			nc	nc	Staphylococcus aureus	1		R	R					R	R		R				R	R	S	S	S		R	S	R
6	1	0	71	2	2	20070716	2	1	orbital lymphoma	2		2		2	2	2	1	PE & PCL	0			FC	FC	Pantoea agglomerans	4	S		S	S		S		S	S		S	S	S	S	S			S				S	S	S
7	1	0	0.08	1	1	20070727	2	2		2		2		2	2	2	2		0			nc	nc	Staphylococcus aureus	1		R	R					R	R		R				R	R	S	S	S		R	R	R
8	1	0	48	2	1	20070809	1	2		2		1	Cosopt, Iopidine	1	1	2	1	PKP	0			LS+	LS+	Acinetobacter baumannii	4	S			R					S		I		S	S				S				S	S	S
9	2	0		2	1	20070809	1	2		2		1	Cosopt, Iopidine	1	1	2	1	PKP	0			LS+	LS+	Acinetobacter lwoffii	4	S			I					S		I		S	S				S				S	S	S
10	1	0	55	1	1	20070821	1	2		2		2		2	1	2	1	PKP, PE & PCL	0			LS-	LS-	Serratia marcescens ss. Marcescens	4	S		R	I		S		R	S		S	S	S	S	R			S				S	S	S
11	1	0	65	2	1	20080401	2	2		2		2		2	2	2	1	Cataract op, TLE	0			HM	HM	Staphylococcus cohnii ss. Urealyticus	1		R	R					R	R		R				R	R	S	S	I		R	S	R
12	1	0	63	2	2	20080403	2	2		2		2		2	1	2	2		0			HM	HM	Staphylococcus hominis ss. Hominis	1																		S	S		S	S		S
13	1	0	71	1	2	20080408	2	2		2		2		2	1	2	1	PKP	0			(0.02)	HM	Staphylococcus epidermidis	1		R	R					R	R		R				R	R	S	R	R		R	R	R
14	1	0	74	2	1	20080426	1	2		2		1	Timoptic XE	2	1	2	1	PKP	0			LS+	HM	Streptococcus pneumoniae	1																					R
15	1	0	74	2	1	20080506	2	2		2		1	Cosopt, Alphagan	2	1	2	1	PKP	0			LS+	LS+	Pseudomonas putida	4	S					I			S		I		S					S				S	S	S
16	1	0	70	1	2	20080513	2	2		2		2		2	1	2	1	PKP, ECCE, PCL	0			0.02	0.06	Streptococcus species, viridans group	1																	S		S		S
17	2	0		1	2	20080513	2	2		2		2		2	1	2	1	PKP, ECCE, PCL	0			0.02	0.06	Corynebacterium species	2																	R		S		S
18	1	0	28	1	1	20080517	2	2		1	T-lens	2		2	2	2	1	congenital glaucoma op	0			FC	0.06	Staphylococcus aureus	1		S	R					S	S		S				S	S	S	S	S		S	S	S
19	1	0	29	2	1	20080925	2	2		1	SCL	2		2	2	2	2		0			0.15	(1.0)	Pseudomonas aeruginosa	4	S					S			S		R		S	R				S				S	S	S
20	1	0	77	2	1	20081008	1	2		2		2		2	1	2	1	PE & PCL	0			0.2	0.3	Staphylococcus aureus	1		S	R					S	S		S				S	S	S	S	S		R	S	S
21	1	0	60	2	1	20081103	2	2		2		1	Rysmon, Iopidine	2	1	2	1	PKP, ECCE	0			HM	HM	Streptococcus pneumoniae	1																					R
22	1	0	35	2	1	20090312	2	1	Steven-Johnson Syndrome	2		2		2	1	2	2		0			0.15	0.9	Staphylococcus epidermidis	1		R	R					R	R		R				R	R	I	R	R		R	R	R
23	1	0	57	1	2	20090312	2	2		2		2		2	1	2	2		0			0.3	0.6	Staphylococcus simulans	1		S	R					S	S		S				S	S	S	S	S		S	R	S
24	2	0		1	2	20090312	2	2		2		2		2	1	2	2		0			0.3	0.6	Staphylococcus warneri	1		S	R					S	S		S				S	S	S	S	S		S	R	S
25	1	0	65	2	1	20090518	2	2		2		2		2	2	1	1	PKP, ECCE, PCL	0	PKP		FC	0.02	Streptococcus species, viridans group	1																	S		S		I
26	1	0	58	2	2	20090708	2	2		2		1	Alphagan, Xalatan, Timolol	2	1	2	1	PKP	0			0.06	0.02	Streptococcus pneumoniae	1																					R
27	1	0	8	2	2	20090907	2	1	Steven-Johnson Syndrome	1	T-lens	2		2	1	2	2		0			LS+	0.6	Staphylococcus epidermidis	1		R	R					R	R		R				R	R	S	S	S		R	I	R
28	1	0	48	1	1	20090908	1	2		2		2		2	2	2	2		1	PKP		HM	HM	Pseudomonas aeruginosa	4	S					S			S				S					S					S
29	1	0	71	2	1	20091005	2	2		2		2		2	2	2	2		0			0.16	(0.3)	Micrococcus species	1																	S		S		S
30	1	0	60	2	1	20091119	2	2		2		1	Timoptic XE	2	1	2	1	PPV, PKP	0			HM	HM	Staphylococcus aureus	1		S	R					S	S		S				S	S	S	S	S		S	S	S
31	1	0	41	2	1	20100104	2	2		2		1	Timolol, Alphagan	1	1	1	1	PKP	0			FC	HM	Haemophilus influenzae	4		S	R	S	S		R				S				S		S	S					S
32	1	0	61	1	2	20100114	2	2		2		2		1	1	2	1	PE & PCL, PKP	0			FC	0.04	Staphylococcus epidermidis	1		S	R					S	S		S				S	S	S	S	S		R	S	S
33	1	0	73	1	2	20100326	2	2		2		1	Rysmon	2	2	2	2		0			FC	HM	Serratia marcescens ss. Marcescens	4	S		R	I		S		R	S		S	S	S	S	R			S				S	S	S
34	1	0	60	2	2	20100722	2	1	Steven-Johnson Syndrome	2		2		1	1	2	1	ECCE & PCL, PKP	1	L) whole corneal culture, PKP, limbal transplantation, transient AMT		LS+	HM	Moraxella species	3	S					S			S	I			S					R				S	S
35	1	0	63	2	2	20100915	2	2		2		2		2	2	2	1	Cataract io	0			LS+	HM	Staphylococcus epidermidis	1		R	R															S	S		R	R	R	S
36	1	0	62	2	2	20100920	1	2		2		1	Alphagan, Trusopt	1	1	2	1	PKP, PPV	0			HM	FC	Staphylococcus aureus	1		R	R															I	S		S	S	R	S
37	1	0	24	2	2	20110329	2	2		1	SCL	2		2	2	2	2		0			(1.0)	(0.8)	Streptococcus species, viridans group	1																	S		I		I
38	1	0	54	1	1	20110407	2	2		2		1	Cosopt	2	1	2	1	PKP	0			HM	HM	Streptococcus pneumoniae	1					R		R		S		S			S	R		R		R		R			S
39	1	0	67	2	1	20110907	1	2		2		2		2	1	2	1	PE & PCL	0			LS+	HM	Pseudomonas aeruginosa	4	S					I			S				S					S					S
40	1	0	76	1	2	20110919	1	2		2		2		2	1	2	1	Cataract op	0			HM	HM	Corynebacterium species	2																	R		I		I
41	1	0	80	2	2	20111201	1	2		2		2		2	2	2	1	Cataract op	0			HM	FC	Pseudomonas aeruginosa	4	S					S			S				S					S					S
42	1	0	62	1	1	20111219	1	2		2		2		2	2	2	2		0			HM	LS-	Staphylococcus aureus	1		S	S															S	S		S	S	S	S
43	1	0	72	1	1	20120120	2	2		2		2		2	2	2	1	ST, Pterygium excision	0			LS-	LS-	Corynebacterium species	2																	S		S		S
44	1	0	21	2	2	20120323	2	2		1	드림렌즈, SCL	2		2	2	2	2		0			FC	(0.5)	Staphylococcus aureus	1		R	R															R	R		R	S	R	R
45	1	0	52	1	1	20120531	2	1	Steven-Johnson Syndrome	2		2		1	1	2	1	PKP	0			0.15	0.02	Corynebacterium species	2																	R		S		S
46	1	0	73	2	1	20120726	2	2		2		1	Timolol, Alphagan	2	2	2	1	PE & PCL	0			0.02	0.04	Enterococcus faecalis	1			S															S			I			S
47	1	0	41	1	2	20120827	2	2		2		1	Timoptic XE, Iopidine	2	1	2	1	PKP + limbal TPL	1	evisceration	1	LS+	LS-	Acinetobacter baumannii	4	S								S				S					S		S		S	S
48	1	0	57	2	2	20121002	2	2		2		2		2	2	2	1	Cataract op	0			(0.9)	(1.0)	Staphylococcus aureus	1		S	R															S	S		S	S	S	S
49	1	0	34	2	1	20121122	2	2		2		1	Cosopt, Alphagan, Lumigan	2	2	2	1	PE, TLE, Ahmed implant op	0			HM	HM	Streptococcus pneumoniae	1					I		R								R		S		S		I			S
50	1	0	69	1	1	20130218	1	2		2		1	Alphagan, Rysmon	2	1	2	1	PKP, PE&PCL, TLE	1	evisceration	1	LS-	LS-	Streptococcus pneumoniae	1					R		R								R		S		R		R			S
51	1	0	63	1	2	20130302	2	2		2		2		2	2	2	2		0			FC	0.06	Pseudomonas aeruginosa	4	S					R			S				S					S					S
52	1	0	71	2	1	20130311	2	1	Steven-Johnson Syndrome	2		2		2	1	2	2		0			HM	FC	Corynebacterium species	2																	S		S		R
53	1	0	83	2	2	20130322	2	2		2		1	Cosopt	1	2	2	1	Cataract op	0			LS-	LS-	Streptococcus species, viridans group	1																	S		S		S
54	1	0	72	2	2	20130430	2	2		2		1	Combigan	2	1	2	1	PKP, PE & PCL, Ahmed implant op	0			HM	HM	Staphylococcus epidermidis	1		R	R															S	S		R	R	R	S
55	1	0	75	1	1	20130430	2	2		2		2		2	2	2	1	Cataract op	0			(0.06)	(0.04)	Acinetobacter baumannii	4	S								S				S					S		S		S	S
56	1	0	28	2	1	20130715	2	2		2		2		2	2	1	1	LASEK	0			(0.5)	(0.9)	Acinetobacter baumannii	4	S								S				S					S		S		S	S
57	1	0	35	1	1	20130804	2	2		1	SCL	2		2	2	2	2		0			(0.8)	0.15	Pseudomonas aeruginosa	4	S					S			S				S					S					S
58	1	0	72	1	2	20130814	2	2		2		2		2	2	2	2		0			FC	0.04	Pantoea species	4	S					I					S	S	S		S	S		S				S	S
59	1	0	26	1	2	20130902	2	2		1	SCL	2		2	2	2	2		0			(0.4)	(0.6)	Pseudomonas aeruginosa	4	S					S			S				S					S					S
60	1	0	79	2	2	20130923	2	2		2		2		2	2	2	2		0			LS-	LS-	Achromobacter xylosoxidans	4	R					R			R				S					I				R	S
61	1	0	73	2	2	20130926	2	2		2		2	사용했을것으로 추정 (기록없음)	2	2	2	1	glaucoma op.	1	evisceration	1	LS-	LS-	Pseudomonas aeruginosa	4	S					I			S				S					S					S
62	1	0	27	2	1	20131002	2	2		1	SCL	2		2	2	2	2		0			0.7	1.2	Staphylococcus, Coagulase negative	1		R	R															S	R		R	R	R	S
63	1	0	72	1	2	20131111	2	2		2		2		2	2	2	2		0			HM	0.15	Pseudomonas aeruginosa	4	S					S			S				S					S					S
64	1	0	80	2	1	20131230	2	2		2		2		2	1	2	1	PKP	0			HM	HM	Sphingomonas paucimobilis	4	S					S			S				S					S				S	S
65	1	0	69	1	1	20140102	2	2		2		1	Combigan	2	2	2	1	Ahmed implant op	0			HM	HM	Corynebacterium species	2																	S		S		I
66	1	0	61	1	2	20140102	2	2		2		2		2	2	2	2		0			0.15	0.15	Acinetobacter baumannii	4	S								R				I					R		S		R	S
67	1	0	67	1	2	20140117	2	1	Lung cancer	2		2		2	2	2	1	PE & PCL	0			0.2	f/u loss	Bacillus species	2																	I		I		R
68	1	0	67	1	2	20140329	2	2		2		1	Cosopt, Alphagan	2	1	2	1	PE & PCL, PKP	0			LS+	HM	Pseudomonas mendocina	4	S					I			S				I					S				S	S
69	1	0	77	1	1	20140407	2	2		2		1	Combigan, Xalatan	2	1	2	1	PKP, Cataract op, TLE	0			HM	LS-	Aeromonas hydrophila	4	S	S							S		S		S					S		S		S	S
70	1	0	76	2	1	20140424	1	2		2		1	Cosopt, Alphagan	2	1	2	1	Cataract op	1	evisceration		LS-	LS-	Pseudomonas aeruginosa	4	S					S			S				S					S					S
71	1	0	33	2	2	20140605	1	2		1	SCL	2		2	2	2	2		0			0.15	0.15	Brevibacillus species	2																	S		R		S
72	1	0	42	2	1	20140605	2	2		2		2		2	2	2	1	LASIK	0			0.1	0.7	Brevibacillus species	2																	S		R		S
73	1	0	79	2	2	20140613	1	2		2		2		2	2	2	2		0			nc	0.2	Streptococcus constellatus ssp constellatus	1																	S		S		S
74	1	0	56	2	2	20141002	2	2		2		1	Rysmon	2	1	2	1	TLE, PKP	1	evisceration	1	LS+	LS-	Staphylococcus warneri	1
75	1	0	54	1	1	20141016	2	1	Steven-Johnson Syndrome	2		1	Cosopt, Alphagan	2	1	2	1	ECCE	0			LS+	HM	Streptococcus pneumoniae	1					S		R		S		S			S	R		S		S		S			S
76	1	0	59	2	2	20141229	2	2		2		2		2	2	2	2		1	PKP		HM	(0.6)	Streptococcus parasanguinis	1																	R		S		I
77	2	0		2	2	20141229	2	2		2		2		2	2	2	2		1	PKP		HM	(0.6)	Staphylococcus saprophyticus	1		R	R															S	S		S	S	R	S
78	1	0	69	1	2	20150102	2	2		2		2		2	1	2	1	PKP	0			HM	FC	Staphylococcus aureus	1	R	R																S	S		S	S	R	S
79	1	0	73	2	2	20150117	2	2		2		2		2	2	2	2		0			FC	FC	Staphylococcus epidermidis	1		S	R															S	S		S	R	S	S
80	2	0		2	2	20150117	2	2		2		2		2	2	2	2		0			FC	FC	Moraxella species	4	S					S			S	R			S					S				S	S
81	1	0	69	1	1	20150317	2	2		2		2		2	2	1	2		0			FC	LS+	Streptococcus pneumoniae	1					R		R		S		S			S	S		S		R		R			S
82	1	0	72	1	2	20150409	2	1	Sjogren syndrome	1	T-lens	2		2	2	2	2		1	PKP		HM	FC	Staphylococcus aureus	1		S	R															S	S		S	S	S	S
83	1	0	66	2	1	20150413	2	2		2		1	Cosopt, Iopidine	2	1	1	1	PKP, PPV	1	evisceration	1	LS+	LS-	Streptococcus species, viridans group	1																	S		S		R
84	1	0	36	2	1	20150811	2	2		2		2		2	2	1	2		0			0.6	0.6	Achromobacter denitrificans	4	S					R			S				S					I				S	S
85	1	0	72	2	2	20150824	1	2		2		1	Cosopt, Alphagan, Xalatan	2	2	2	1	Cataract op, PPV	0	evisceration	1	LS-	LS-	Providencia rettgeri	4	S	R							S		S		S					S		R		S	I
86	1	0	55	2	1	20151019	2	2		2		1	Cosopt	2	2	2	1	Cataract op	0			HM	HM	Streptococcus dysgalactiae ss. Equisimilis	1			S								S			S					S		S			S
87	1	0	72	2	1	20151124	1	2		2		2		2	2	1	1	PKP	0			HM	FC	Streptococcus species, viridans group	1																	S		S		S
88	1	0	69	2	1	20151229	2	2		2		1	Xalatan, Cosopt	2	2	2	2		0			nc	(0.4)	Paenibacillus spp	4																	S		R		R
89	1	0	82	2	2	20160328	2	2		2		2		2	2	2	1	PEPCL	0			0.5	0.9	Serratia marcescens ss. Marcescens	4	S	R							S		S		S					S		R		S	S
90	2	0		2	2	20160328	2	2		2		2		2	2	2	1	PEPCL	0			0.5	0.9	Morganella morganii ss. Morganii	4	S	R							S		S		S					S		R		R	S
91	1	0	33	2	2	20160710	2	2		2		2		2	2	2	1	LASEK	0			(1.0)	0.8	Streptococcus pneumoniae	1											S			S					R		R			S
92	1	0	68	2	2	20160927	2	2		2		2		2	2	2	2		0			0.5	0.4	Micrococcus species	1																	S		S		S
93	1	0	61	2	2	20160116	2	1	Sjogren syndrome	2		2		2	2	2			0			HM	FC	Staphylococcus auricularis	1		R	R															S	I		S	S	R	S
94	1	0	70	2	1	20160318	2	2		2		2		2	2	2	2		0			FC	0.5	Sphingomonas paucimobilis	4	S								S				S									S	S
95	1	0	64	2	2	20160813	2	2		2		1	Combigan	2	1	2	1	PKP, Ahmed implant op, PEPCL	0			HM	HM	Staphylococcus aureus	1		S	S															S	S		S	S	S	S
96	1	0	71	2	1	20160408	2	2		2		2		2	1	2	1	PKP, ECCE	0			FC	FC	Streptococcus parasanguinis	1																	S		S		R
97	1	0	58	2	1	20160128	2	2		2		1	Combigan	2	1	2	1	PKP, I&A and IOL insertion (open sky)	1	PKP		LS+	LS-	Micrococcus species	1																	S		S		S
98	1	0	65	1	2	20161226	2	1	SJS	2		2		1	1	2	1	PE PCL, Buccal mucosa graft, AMT	0			0.04	0.06	Micrococcus luteus	1																	S		I		S
99	1	0	75	2	2	20160627	2	2		2		2		2	2	2	2		0			LS-	HM	Staphylococcus aureus	1		S	R															S	S		S	S	S	S
100	1	0	60	2	1	20160316	2	1	colon cancer	2		2		2	2	2	2		0			0.15	0.3	Dermacoccus nishinomiyaensis	1																	S		R		S
101	1	0	27	2	2	20160416	2	2		2		2		2	2	2	1	LASEK	0			0.9	1.2	Streptococcus sanguinis	1																	R		R		R
102	1	0	72	1	1	20160131	1	2		1	SCL	2		2	2	2	1	Cataract op (aphakia)	0			(0.1)	(0.4)	Micrococcus species	1																	S		S		R
103	1	0	75	1	1	20160103	2	2		2		2		2	2	1	1	Corneal FB, PCL	0	Evisceration	1	(HM)	(LS-)	Pseudomonas aeruginosa	4	S					R			I				S					R					S
104	1	0	67	2	2	20160416	2	2		2		2		2	2	2	2		0			(FC)	(0.15)	Streptococcus sanguinis	1																	S		S		S
105	1	0	64	2	2	20160826	2	2		2		2		2	2	2	1	PE PCL	0			FC	FC	Streptococcus sanguinis	1														S					S		S
106	1	0	27	2	2	20160907	2	2		1	SCL	2		2	2	2	2		0			(0.8)	(0.6)	Staphylococcus epidermidis	1		S	R															S	S		S	S	S	S
107	1	0	6	2	1	20160904	2	2		2		2		2	2	2	2		0			0.8	1.2	Moraxella species	3	S					S			S	R			S					S				S	S
[truncated: 19 more columns]
